# Supplementary material for: Local Rather than Global H3K27me3 Dynamics Are Associated with Differential Gene Expression in Verticillium dahliae
Source: PubMed Central journal article supplement (PMC8822345; doi:10.1128/mbio.03566-21), 2022-02-08
Supplement: mbio.03566-21-sf003.pdf [file mbio.03566-21-sf003.pdf]

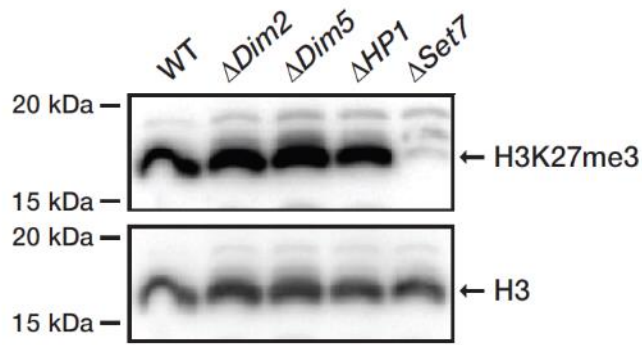

**Figure S3. Western blot shows loss of H3K27me3 in the *V. dahliae* Set7 deletion mutant.** Histone isolations of wild-type,  $\Delta$ Dim2,  $\Delta$ Dim5,  $\Delta$ HP1 and  $\Delta$ Set7 were tested for presence of the H3K27me3 histone modification by Western blotting. The antibody against H3 was used as loading control.
