# Supplementary material for: Local Rather than Global H3K27me3 Dynamics Are Associated with Differential Gene Expression in Verticillium dahliae
Source: PubMed Central journal article supplement (PMC8822345; doi:10.1128/mbio.03566-21), 2022-02-08
Supplement: mbio.03566-21-sf004.pdf [file mbio.03566-21-sf004.pdf]

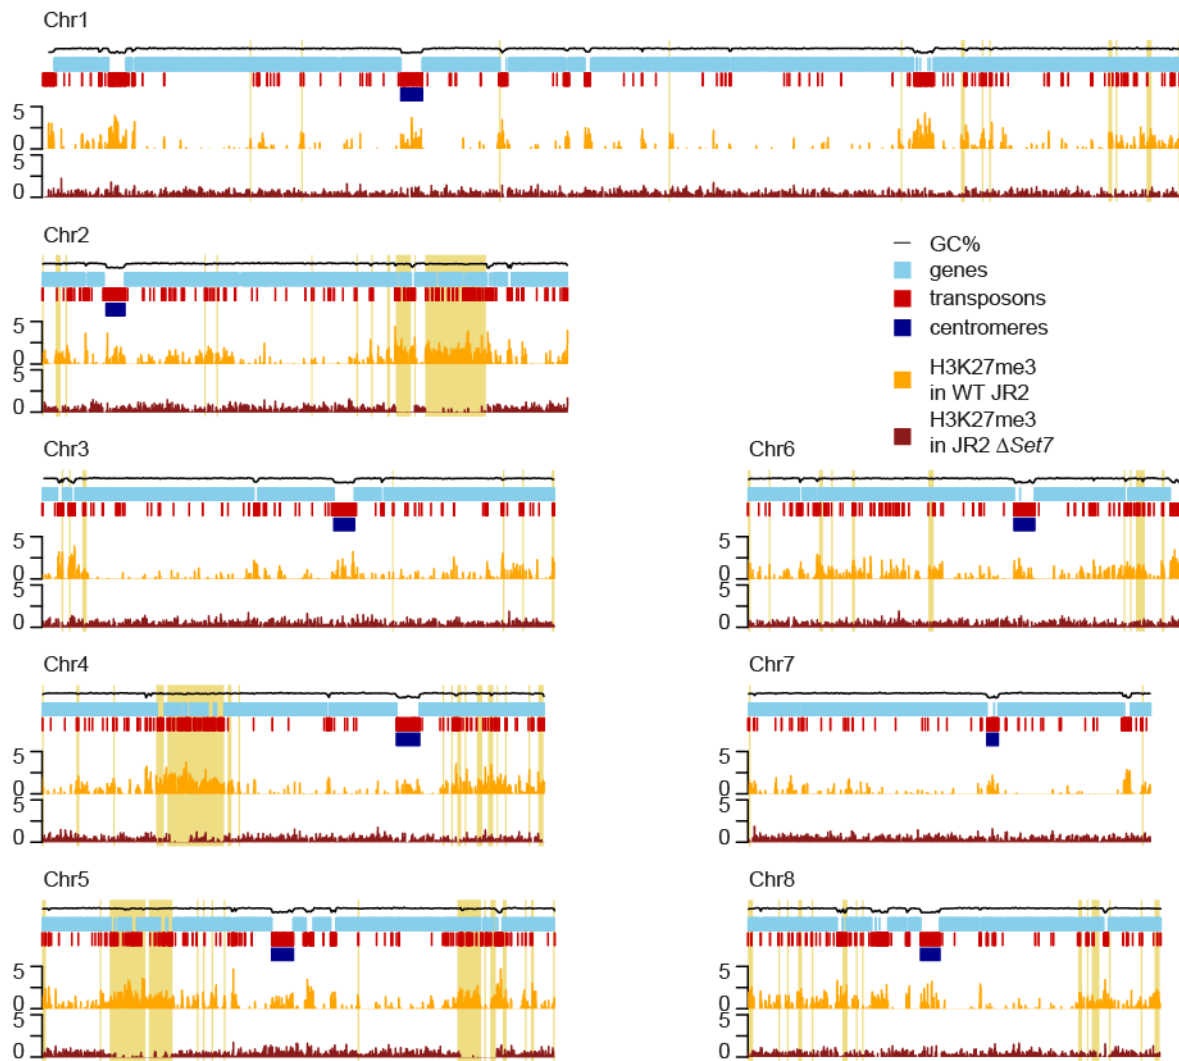

**Figure S4. ChIP-sequencing shows loss of H3K27me3 in the *V. dahliae*  $\Delta$ Set7 mutant.** H3K27me3 ChIP coverage over the genome in a triplicate of JR2 WT (yellow) and in a duplicate of JR2  $\Delta$ Set7, cultivated for 6 days in potato dextrose broth.
