# Supplementary material for: Local Rather than Global H3K27me3 Dynamics Are Associated with Differential Gene Expression in Verticillium dahliae
Source: PubMed Central journal article supplement (PMC8822345; doi:10.1128/mbio.03566-21), 2022-02-08
Supplement: mbio.03566-21-sf005.pdf [file mbio.03566-21-sf005.pdf]

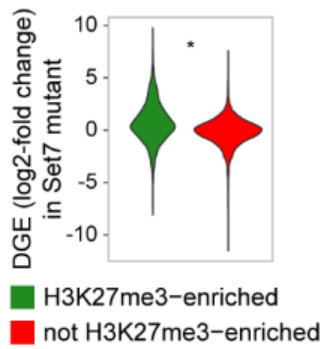

**Figure S5. Genes associated with H3K27me3 in wild type *V. dahliae* are stronger transcriptionally induced in the  $\Delta$ Set7 mutant than not H3K27me3 associated genes.** Log2-fold change of expression between wild type and  $\Delta$ Set7 mutant for genes associated with H3K27me3 in wild type (green) and those not associated with H3K27me3 in wild type (red). Significant difference of log2-fold change between gene sets are determined with the One-Sample Wilcoxon Signed Rank Test (\*:  $p \leq 0.05$ ).
