# Supplementary material for: Local Rather than Global H3K27me3 Dynamics Are Associated with Differential Gene Expression in Verticillium dahliae
Source: PubMed Central journal article supplement (PMC8822345; doi:10.1128/mbio.03566-21), 2022-02-08
Supplement: mbio.03566-21-st001.pdf [file mbio.03566-21-st001.pdf]

**Table S1: Primers used to delete and analyze the Set7 coding sequence in *V. dahliae*.**

| <b>Name</b>    | <b>Sequence</b>                          | <b>Purpose</b>                       | <b>Number</b> |
|----------------|------------------------------------------|--------------------------------------|---------------|
| Set7.ko-LB_F   | <i>GGTCTTAAUTGAGCTTGACAGTTCAGTTGTCG</i>  | Amplify left flanking sequence       | 1             |
| Set7.ko-LB_R   | <i>GGCATTAAUAAGTTGTGTTGTCAGCGTCATA</i>   | Amplify left flanking sequence       | 2             |
| Set7.ko-Rb_F   | <i>GGA</i> CTTAAUATCAAGTCCGCCTACTTTCCAAG | Amplify right flanking sequence      | 3             |
| Set7.ko-Rb_F   | <i>GGGTTTAAUGTGGAGAATCGTCTGGGGTTATC</i>  | Amplify right flanking sequence      | 4             |
| Set7_Confirm_F | CCTCCAGCTCCTGAAGAAGAA                    | Confirm gene replacement (selection) | 5             |
| Vector_Reverse | GGAGTCGCATAAGGGAGAGCG                    | Confirm gene replacement (selection) | 6             |
| Set7.ORF.270_F | TCACAGCCGCTACATCAATCA                    | Confirm ORF is absent in KO          | 7             |
| Set7.ORF.270_R | TCGTGTTGAACCTCCTTGGAC                    | Confirm ORF is absent in KO          | 8             |

Italic sequences at the 5' ends represent adapters added for USER cloning
